# Supplementary material for: Extraction and coordination studies of a carbonyl–phosphine oxide scorpionate ligand with uranyl and lanthanide(iii) nitrates: structural, spectroscopic and DFT characterization of the complexes
Source: Royal Society of Chemistry journal article supplement (doi:10.1039/c5dt04963f), 2016-01-01
Supplement: c5dt04963f1.pdf [file c5dt04963f1.pdf]

## Supplementary Data

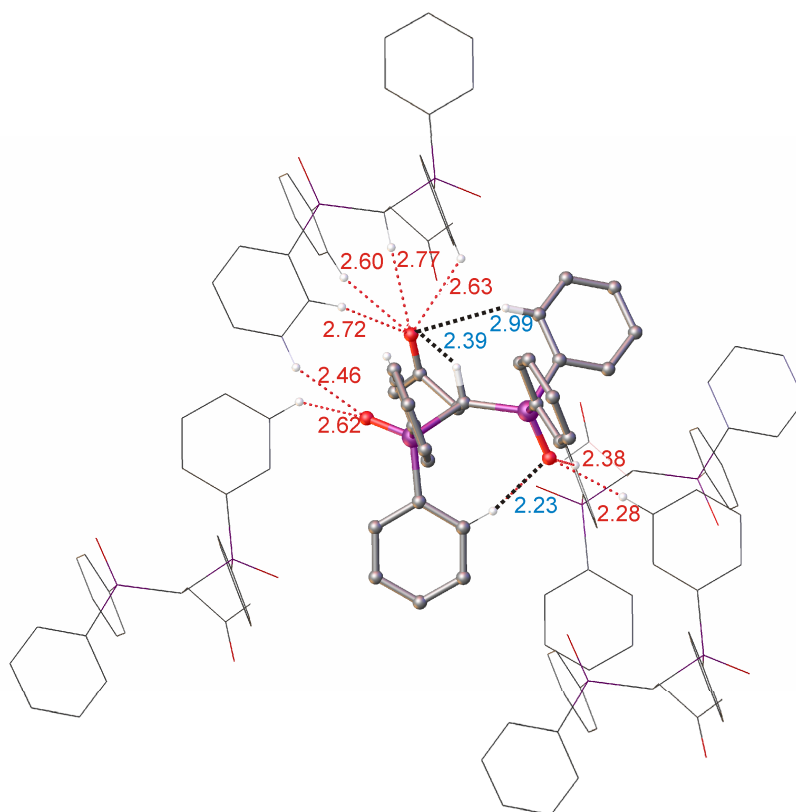

**Fig. S1.** C-H...O(C) intra- and intermolecular bonding in crystalline **L** (shown in blue and red, respectively). Hydrogen atoms not involved in H-bonding are omitted for clarity.

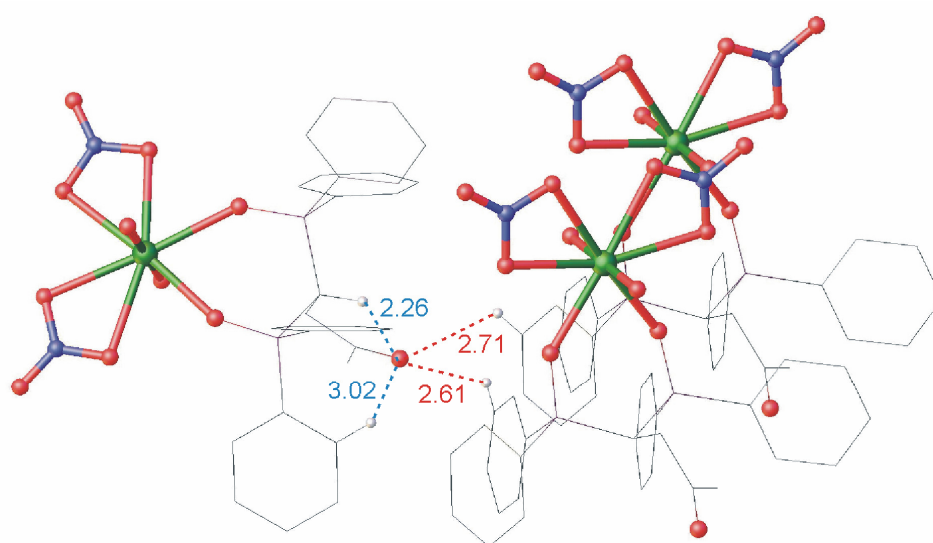

**Fig. S2.** C-H...O(C) intra- and intermolecular bonding in crystalline complex **1** (shown in blue and red, respectively). Hydrogen atoms not involved in H-bonding are omitted for clarity.

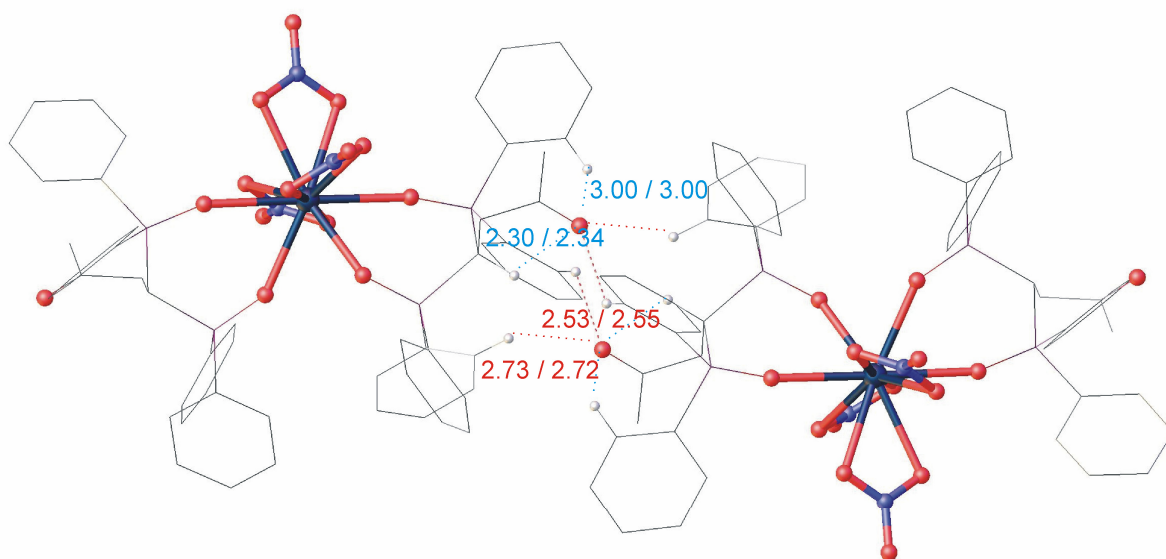

**Fig. S3.** C–H...O(C) intra- and intermolecular bonding in crystalline isostructural complexes **3**, **4** (shown in blue and red, respectively). Hydrogen atoms and solvate molecules not involved in H-bonding are omitted for clarity. For **3** and **4** the values of bond lengths are divided by slash.

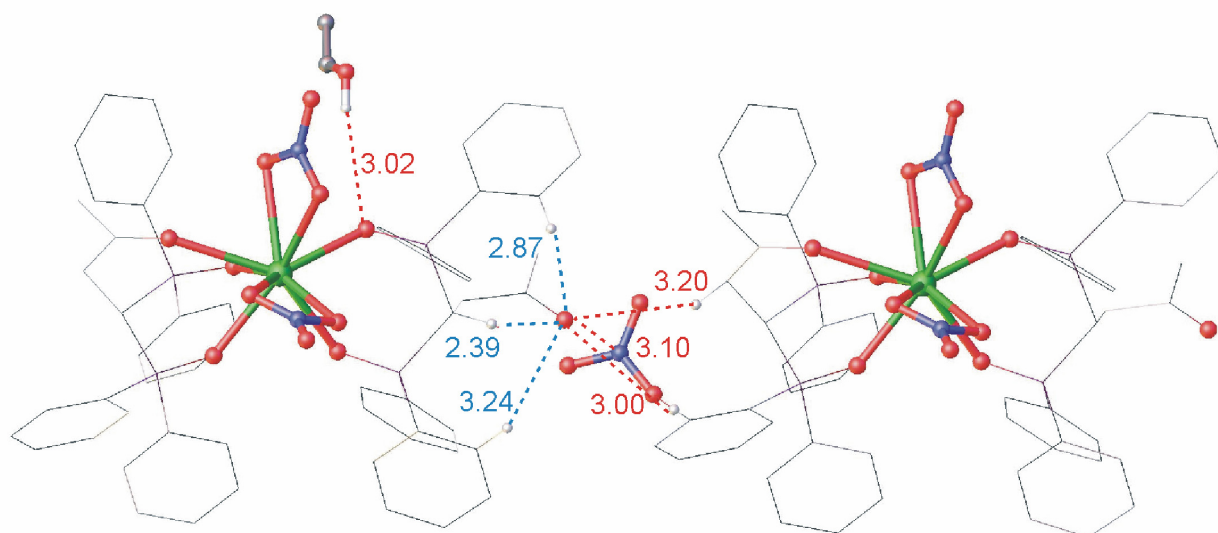

**Fig. S4.** C–H...O(C) and O–H...O(P) intra- and intermolecular bonding in crystalline complex **5** (shown in blue and red, respectively). Hydrogen atoms not involved in H-bonding are omitted for clarity.

**Table S1.** Selected IR data ( $\nu$ ,  $\delta$  and  $\gamma$ ,  $\text{cm}^{-1}$ ) and assignments<sup>a</sup> for complexes **1**, **3–6**<sup>b</sup>

| Compound | $\nu(\text{N=O})$ | $\nu_{\text{as}}(\text{NO}_2)$ | $\nu_{\text{s}}(\text{NO}_2)$ | $\delta$<br>(out-of-plane) | $\gamma$<br>(bending in plane) |
|----------|-------------------|--------------------------------|-------------------------------|----------------------------|--------------------------------|
| <b>1</b> | 1518, 1483        | 1308,1282                      | 1039,1032                     | 812                        | 748                            |
| <b>3</b> | 1458br            | 1313,1295sh                    | 1031                          | 820                        | 732                            |
| <b>4</b> | 1503,1468         | 1300                           | 1031                          | 818                        | 730                            |
| <b>6</b> | 1518sh, 1494      | 1310                           | 1030                          | 815                        | 747                            |

<sup>a</sup> K. Nakamoto, *Infrared and Raman Spectra of Inorganic and Coordination Compounds, Part B, Applications in Coordination, Organometallic, and Bioinorganic Chemistry*, Wiley, New York, 6th Edition, 2009, 424 pp.

<sup>b</sup> Spectral data for coordinated nitrate ions in complexes **4** and **5** are identical.

**Table S2.** Extraction of *f*-block elements by ligandes **L** and **L'** (0.01 M solutions in  $\text{CHCl}_3$ ) from 3.75 M  $\text{HNO}_3$ ; the initial concentration of lanthanide and uranyl nitrates in the aqueous phase is  $2.5 \cdot 10^{-4}$  M.

| Ligand    | Distribution ratios ( $D_M$ ) |                 |                 |                 |                 |
|-----------|-------------------------------|-----------------|-----------------|-----------------|-----------------|
|           | U(VI)                         | La(III)         | Nd(III)         | Ho(III)         | Yb(III)         |
| <b>L</b>  | $37.2 \pm 1.5$                | $0.58 \pm 0.01$ | $0.65 \pm 0.01$ | $0.69 \pm 0.01$ | $1.05 \pm 0.01$ |
| <b>L'</b> | $6.4 \pm 0.2$                 |                 | $0.18 \pm 0.01$ | $0.20 \pm 0.01$ |                 |

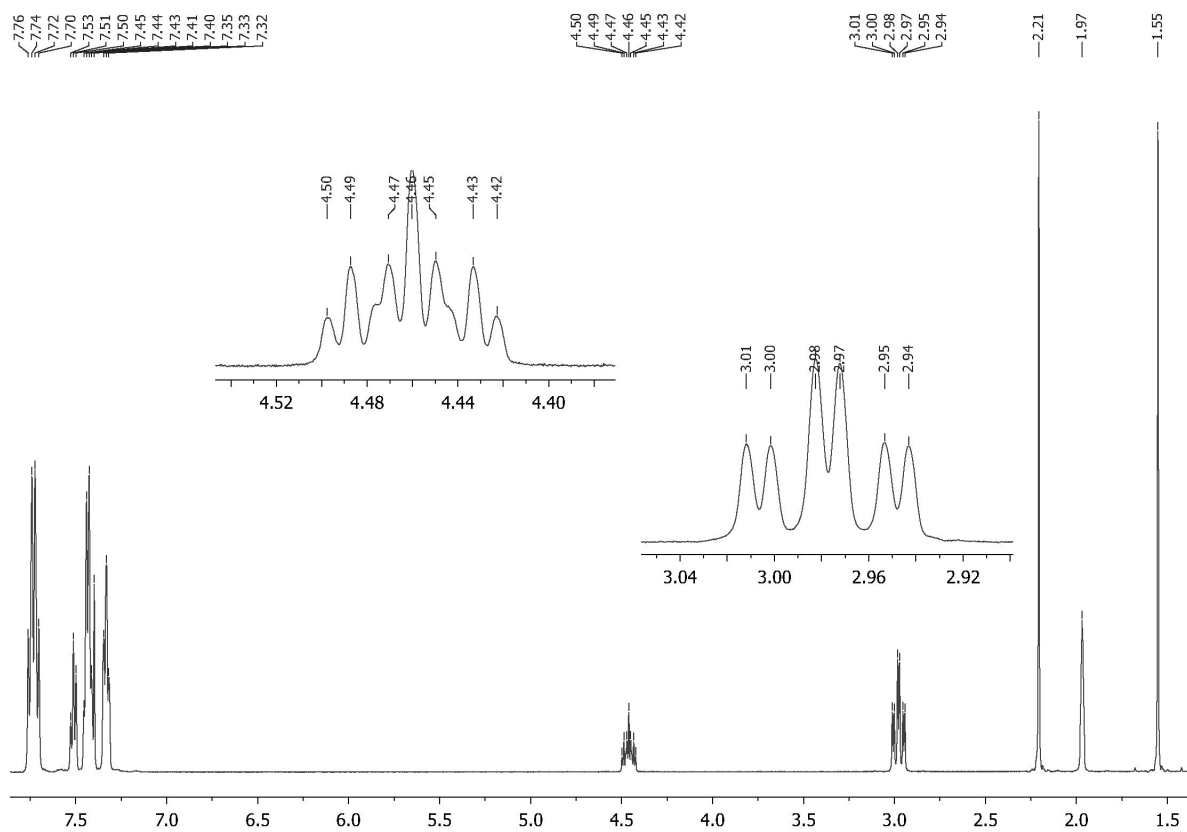

**Fig. S5.**  $^1\text{H}$  NMR spectrum of **L** (0.02 M solution in  $\text{CD}_3\text{CN}$ ).

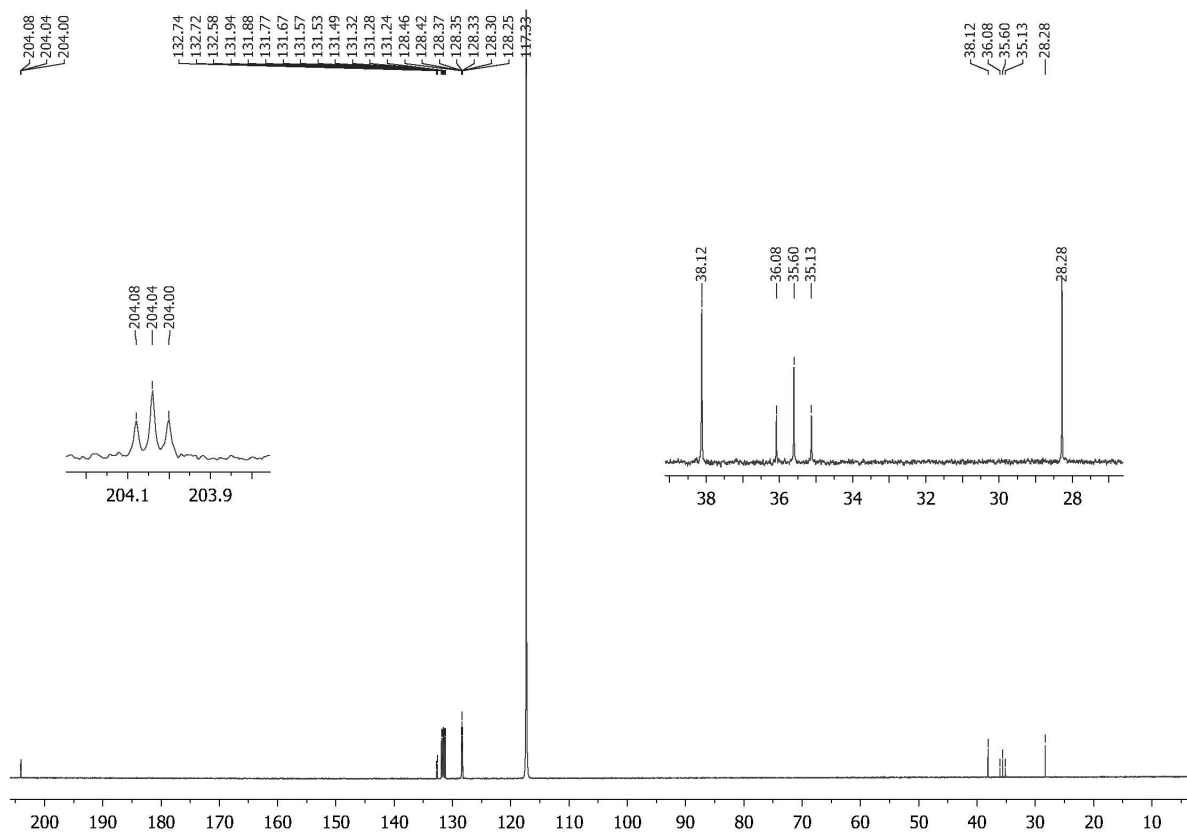

**Fig. S6.**  $^{13}\text{C}$  NMR spectrum of **L** (0.02 M solution in  $\text{CD}_3\text{CN}$ ).

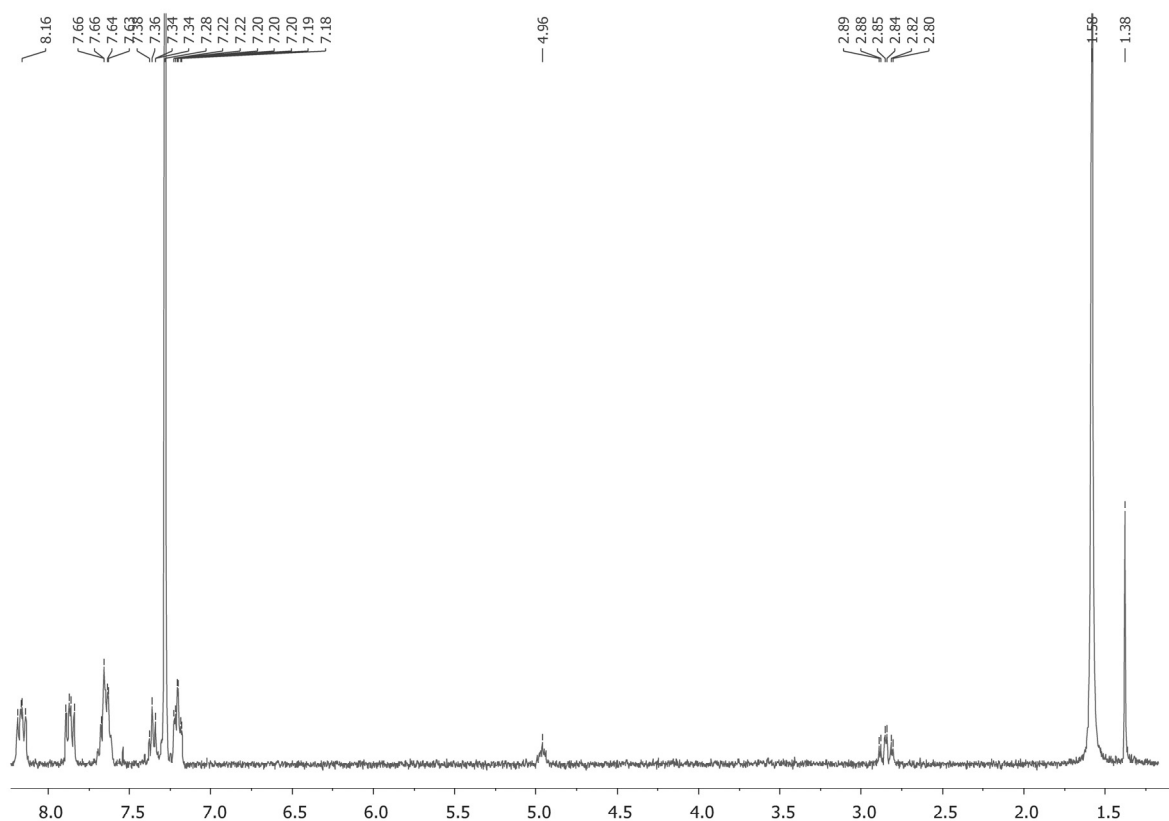

**Fig. S7.**  $^1\text{H}$  NMR spectrum of complex 1 (saturated solution,  $\sim 0.003$  M, in  $\text{CDCl}_3$ ).

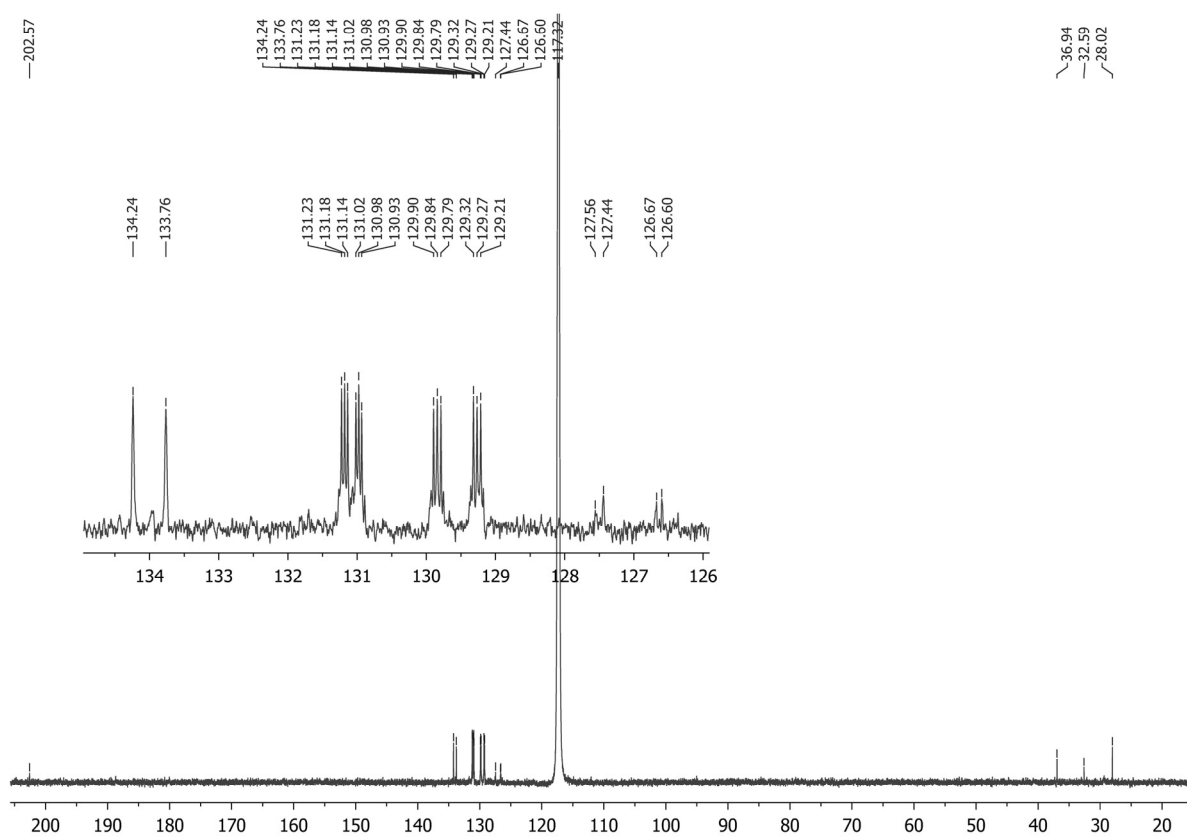

**Fig. S8.**  $^{13}\text{C}$  NMR spectrum of complex 1 (saturated solution,  $\sim 0.003$  M, in  $\text{CD}_3\text{CN}$ ).

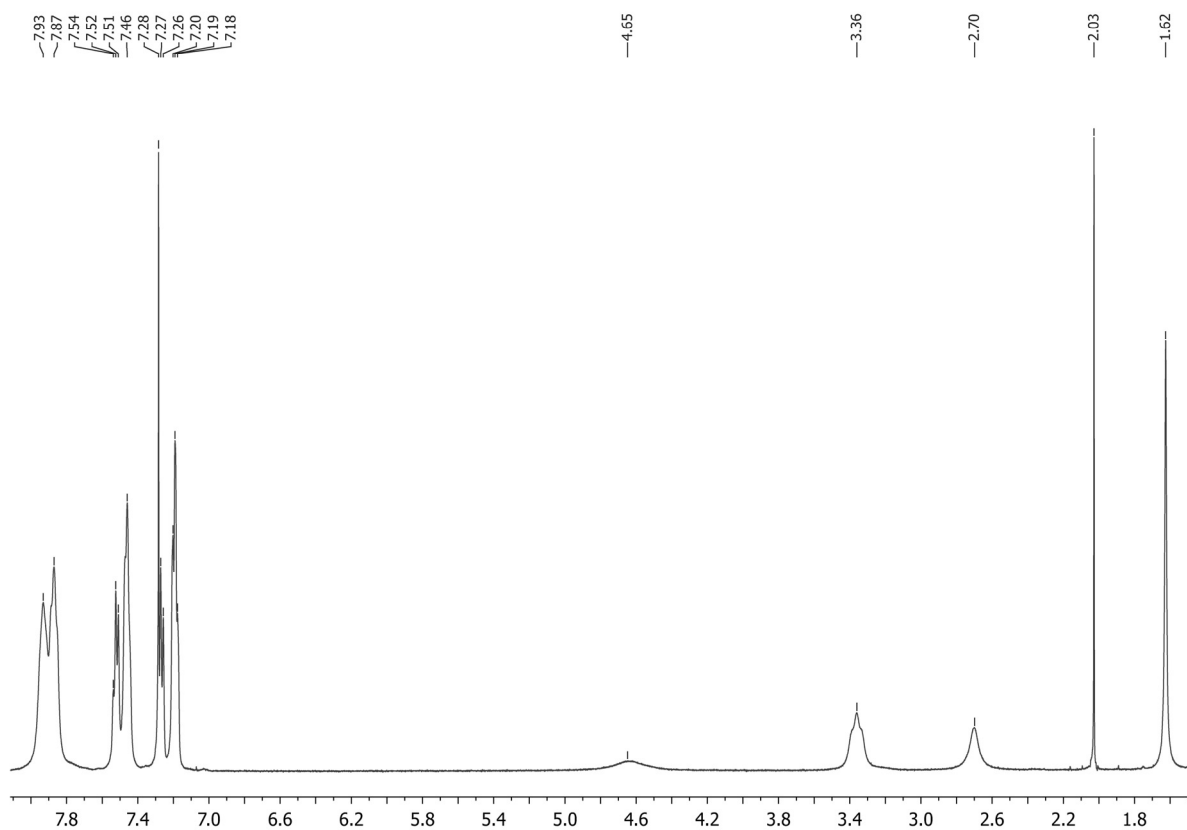

**Fig. S9.**  $^1\text{H}$  NMR spectrum of complex **3** (0.01 M, in  $\text{CDCl}_3$ ).

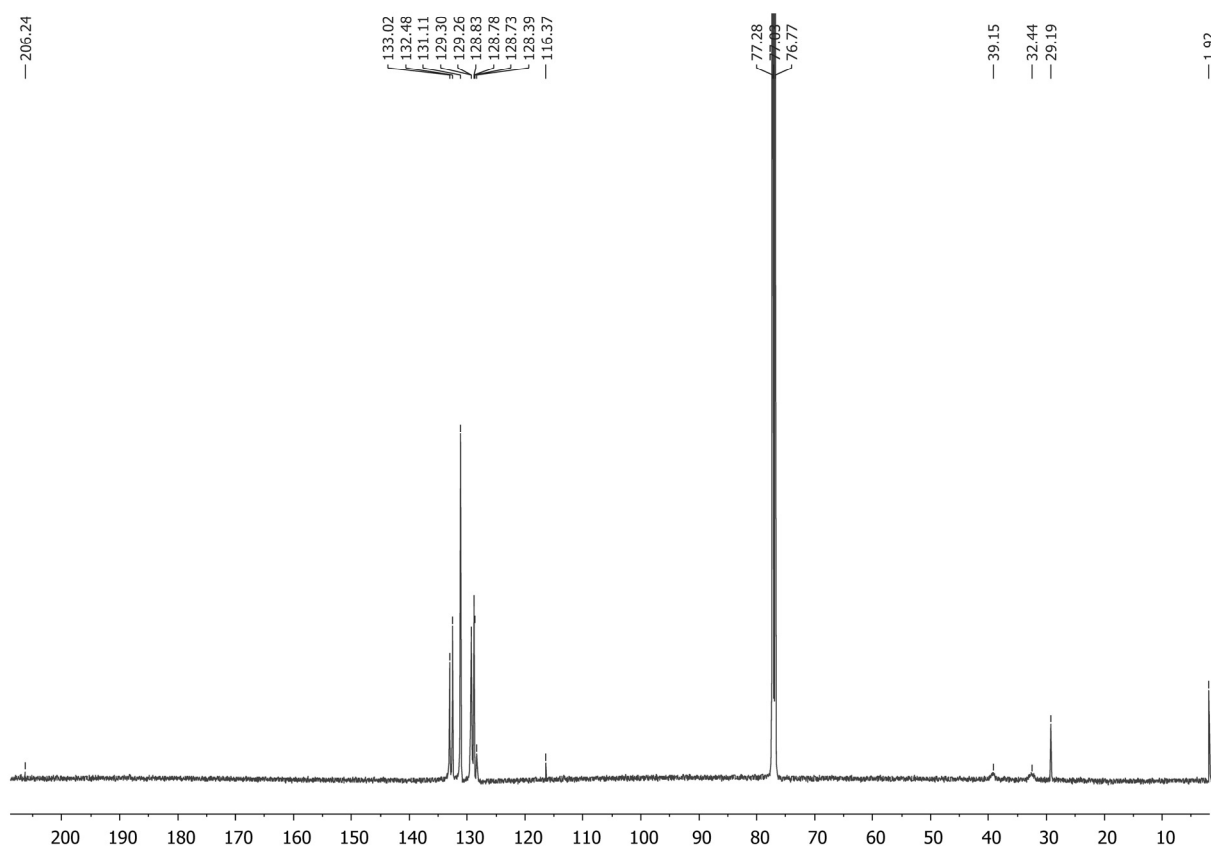

**Fig. S10.**  $^{13}\text{C}$  NMR spectrum of complex **3** (0.01 M, in  $\text{CDCl}_3$ ).

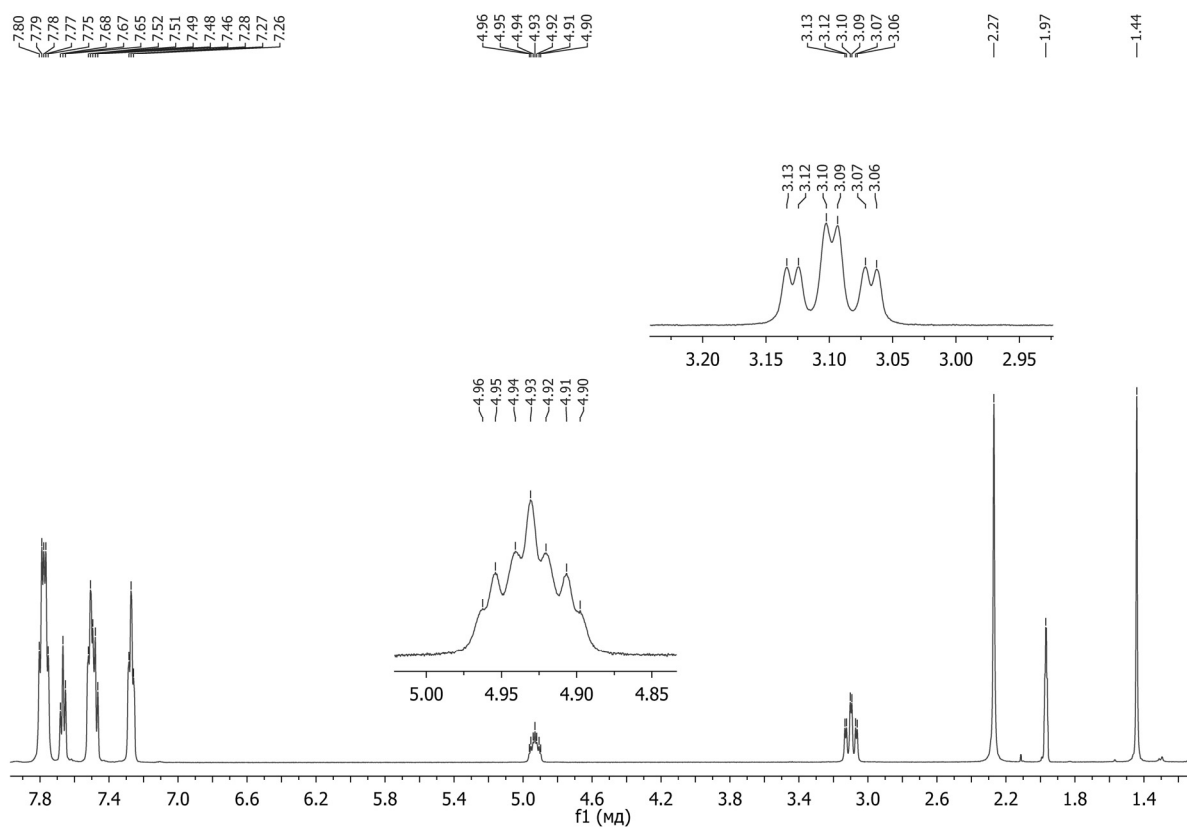

**Fig. S11.**  $^1\text{H}$  NMR spectrum of complex **6** (0.01 M, in  $\text{CD}_3\text{CN}$ ).

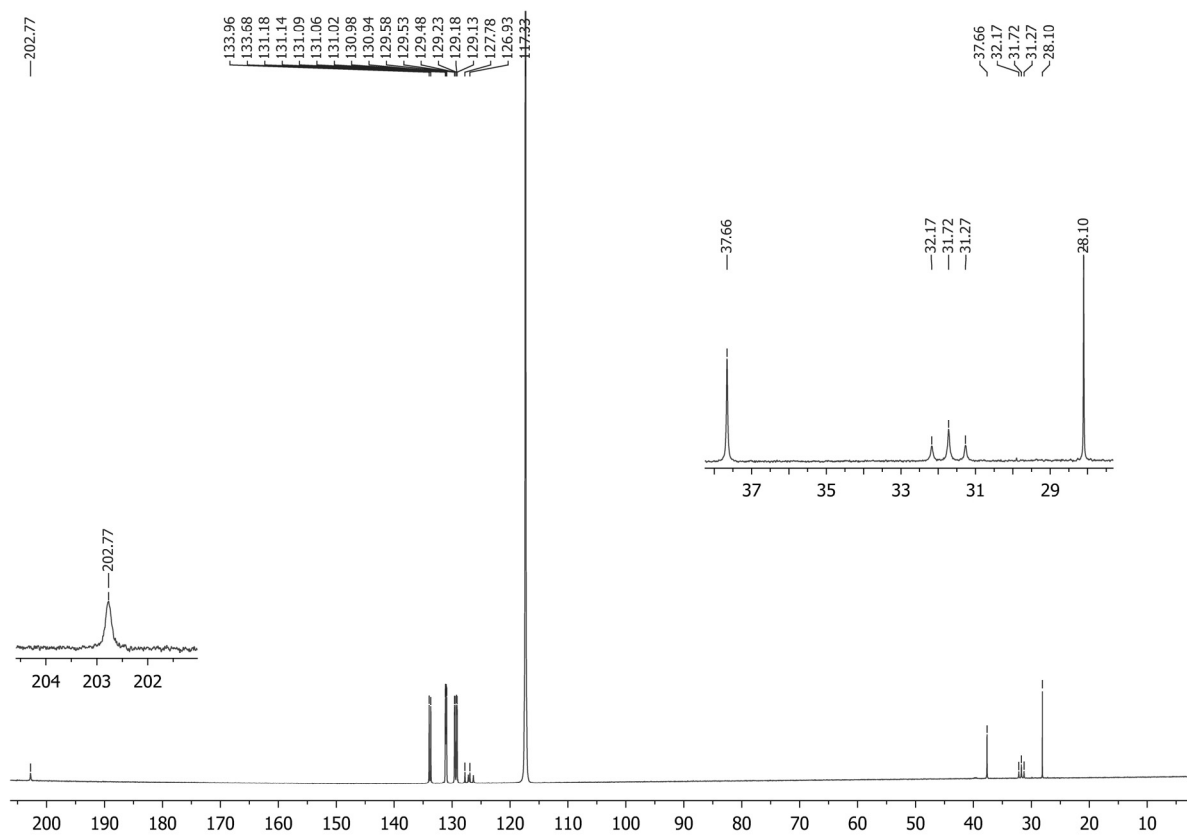

**Fig. S12.**  $^{13}\text{C}$  NMR spectrum of complex **6** (0.01 M, in  $\text{CD}_3\text{CN}$ ).
